1 Clinical and Virological Features of patients hospitalized with different types  
2 of COVID-19 vaccination in Mexico City

3

4 Alejandra Hernández-Terán<sup>1</sup>, Pamela GarciaDiego<sup>2</sup>, Marco Villanueva-Reza<sup>2</sup>, Celia Boukadida<sup>3</sup>, Blanca Taboada<sup>4</sup>,  
5 Eduardo Porras<sup>2</sup>, Victor Ahumada-Topete<sup>2</sup>, Kathia Tapia Diaz<sup>3</sup>, Margarita Matias-Florentino<sup>3</sup>, Marissa Pérez-García<sup>3</sup>,  
6 Santiago Ávila-Rios<sup>3</sup>, Fidencio Mejía-Nepomuceno<sup>1</sup>, Ricardo Serna-Muñoz<sup>1</sup>, Fortunato Juárez-Hernández<sup>5</sup>, Maria  
7 Eugenia Jiménez-Corona<sup>6</sup>, Eduardo Becerril-Vargas<sup>7</sup>, Omar Barreto<sup>8</sup>, Jose Arturo, Martínez-Orozco<sup>7</sup>, Rogelio Pérez-  
8 Padilla<sup>1</sup>, Carlos F. Arias<sup>4</sup>, Joel Armando Vázquez-Pérez<sup>1</sup>.

9 <sup>^</sup>These authors contributed equally to this work.

10 <sup>1</sup>Departamento de Investigación en Tabaquismo y EPOC. Instituto Nacional de Enfermedades Respiratorias Ismael Cosío  
11 Villegas, INER, Ciudad de Mexico.

12 <sup>2</sup>Departamento de Unidad de Epidemiología Hospitalaria e Infectología. Instituto Nacional de Enfermedades Respiratorias  
13 Ismael Cosío Villegas, INER, Ciudad de Mexico.

14 <sup>3</sup>Centro de Investigación en Enfermedades Infecciosas, CIENI,  
15 Instituto Nacional de Enfermedades Respiratorias Ismael Cosío Villegas, INER, Ciudad de Mexico.

16 <sup>4</sup>Departamento de Genética del Desarrollo y Fisiología Molecular, Instituto de Biotecnología, Universidad Nacional  
17 Autónoma de México, Ciudad de Mexico.

18 <sup>5</sup>Departamento de Imagenología, Instituto Nacional de Enfermedades Respiratorias Ismael Cosío Villegas, INER, Ciudad  
19 de Mexico.

20 <sup>6</sup>Departamento de Epidemiología, Instituto Nacional de Cardiología Ignacio Chávez, Ciudad de Mexico.

21 <sup>7</sup>Laboratorio de Microbiología, Instituto Nacional de Enfermedades Respiratorias Ismael Cosío Villegas, INER, Ciudad de  
22 Mexico.

23 <sup>8</sup>Coordinación de Atención Médica, Instituto Nacional de Enfermedades Respiratorias Ismael Cosío Villegas, INER,  
24 Ciudad de Mexico.

25 **Corresponding authors:** Carlos F Arias, Joel Armando Vazquez-Perez

26 E-mail: carlos.arias@ibt.unam.mx / joevazpe@gmail.com

27

28

29

30 **ABSTRACT**

31 Coronavirus disease 2019 (COVID-19) vaccines are very effective at protecting against severe  
32 disease and death. However, the impact of the vaccine used, viral variants, and host factors on  
33 disease severity remain poorly understood. Here we compared COVID-19 clinical presentations and  
34 outcomes in vaccinated and unvaccinated patients in Mexico City. From March to September 2021,  
35 clinical and demographic characteristics were obtained from 1,014 individuals with a documented  
36 SARS-CoV-2 infection, and viral variants were identified in a subset of 386 patients. We compared  
37 unvaccinated, partially vaccinated, and fully vaccinated patients, stratifying by age groups. We  
38 fitted multivariate statistical models to evaluate the impact of vaccination status, SARS-CoV-2  
39 lineages, vaccine types, and clinical parameters. Most hospitalized patients were unvaccinated. In  
40 patients over 61 years old, mortality was significantly higher in unvaccinated compared to fully  
41 vaccinated individuals. In patients aged 31 to 60 years, vaccinated patients were more likely to be  
42 outpatients (46%) than unvaccinated individuals (6.1%). We found immune disease and age above  
43 61 years old as risk factors. While fully vaccination was found as the most protective factor against  
44 in-hospital death. This study suggests that vaccination is essential to reduce mortality in a comorbid  
45 population such as that of Mexico.

46

47 **KEYWORDS:** COVID-19, vaccination, SARS-CoV-2 lineages, COVID-19 severity.

48

49

50

51

52

53

54

## 55 INTRODUCTION

56 Severe acute respiratory syndrome coronavirus 2 (SARS-CoV-2) was first detected in  
57 Wuhan, China, in December 2019 [1]; since then, more than 500 million people have been  
58 infected, and over six million have died worldwide [2]. SARS-CoV-2 has evolved and  
59 several mutations throughout the genome have been detected worldwide [3]. Genomic  
60 mutations are anticipated events during virus replication, and although most mutations are  
61 expected to be neutral some can confer a fitness advantage and be fixed in the viral genome  
62 [4,5]. The accumulation of mutations over time generates new SARS-CoV-2 variants [6].  
63 The World Health Organization (WHO) has classified them as variants of concern (VOC),  
64 variants of interest (VOI), and variants under monitoring (VUM) (WHO, tracking SARS-  
65 CoV-2 variants). VOC are SARS-CoV-2 variants with increased transmissibility, virulence,  
66 or decreased effectiveness of vaccines, therapeutics, diagnostics, or public health and social  
67 measures [6].  
68 As in other countries, in Mexico, several variants classified as VOC, VOI, and VUM have  
69 been detected, particularly Delta, Alpha, Gamma, Mu [7], and more recently Omicron [8].  
70 Moreover, B.1.1.519 was detected as the predominant lineage in Mexico during late 2020  
71 and the first months of 2021 [9]. The B.1.1.519 lineage was dominant during the second  
72 COVID-19 wave in Mexico and may have been associated with an increased risk of severe  
73 and fatal outcomes [10].  
74 In Mexico, vaccination against COVID-19 began in December 2020 with the health  
75 personnel and people older than 60 years old, followed by people over 50. Until September  
76 30, 2021, 101,190,484 doses have been applied with a variety of platforms; of which  
77 43,431,200 doses were of Oxford-AstraZeneca (ChAdOx1 nCov-19 adenoviral vector),  
78 33,022,275 of Pfizer BioNTech (RNA platform, mRNA-BNT162b2), 20,000,000 of

79 SinoVac (inactivated virus), 9,900,000 of Sputnik V (Gam-COVID-Vac), 8,149,930 of  
80 CanSino (Convidecia or AD5-nCOV); 3,500,000 of Moderna (mRNA-1273), and  
81 1,350,000 of Janssen (AD26.coV2.s). By the end of September 2021, almost 50% of the  
82 population over 18 years old had received at least one dose of vaccine [11].  
83 Importantly, COVID-19 vaccines have been shown to be effective at preventing severe  
84 disease and death even in patients with comorbidities [12]. As a result, fully vaccinated  
85 persons are less likely to experience severe disease or death than unvaccinated persons with  
86 the same medical conditions [13]. Nonetheless, vaccines are less effective at protecting  
87 from SARS-CoV-2 infections, and this partial protection seems to wane after a few months,  
88 leading to infections in vaccinated individuals (breakthrough infections) [14]. Furthermore,  
89 one of the most critical factors behind the changing vaccine effectiveness is the viral  
90 variability and the mutations that affect the recognition of neutralizing antibodies elicited  
91 by vaccination or previous infections [15,16]. These mutations are located mainly in the  
92 Receptor Binding Domain (RBD) of Spike protein [17].  
93 Understanding the impact of vaccination, viral variants, and host factors on disease severity  
94 is critical to guide COVID-19 vaccination campaigns and protective measures. Here, we  
95 analyzed the main risk factors for severe COVID-19, comparing the outcomes and clinical  
96 presentation of vaccinated and unvaccinated patients, and analyzing the effects of both  
97 SARS-CoV-2 lineages and vaccine types in a tertiary hospital in Mexico City from March  
98 to September 2021.

99

100

101

102

## 103 **MATERIAL AND METHODS**

### 104 **Study participants and clinical data**

105 We analyzed 1014 patients with SARS-CoV-2 infection who received medical attention  
106 from March to September 2021 at the Instituto Nacional de Enfermedades Respiratorias  
107 (INER), belonging to the Ministry of Health of Mexico. INER is a reference hospital for  
108 respiratory diseases that primarily provide services for uninsured individuals and was  
109 designated as a hospital exclusive for COVID-19 in March 2020, offering between 150-200  
110 beds for the attention of critically ill patients.

111 For all patients, demographic data, clinical symptoms, laboratory, radiology data, and  
112 outcome-related information were obtained from electronic medical records. Clinical  
113 management was performed according to the standards of care and attending physicians.  
114 Follow-up went from the time of admission for up to 28 days. This study was reviewed and  
115 approved by the Science, Biosecurity, and Bioethics Committee of the Instituto Nacional de  
116 Enfermedades Respiratorias (B-10-20). In addition, the Institution requested informed  
117 consent for the recovery, storage, and use of biological remnants for research purposes.

118

### 119 **SARS-CoV-2 diagnostics**

120 Oropharyngeal and/or nasopharyngeal swabs were collected, and the diagnosis was made  
121 using validated RT-qPCR protocols for SARS-CoV-2 RNA detection, approved by the  
122 World Health Organization (WHO).

123

### 124 **RNA extraction and sequencing**

125 *Complete genome sequencing*

126 Viral nucleic acid extraction was performed using a MagNa Pure L.C. 2-0 system (Roche,  
127 Indianapolis, OH, USA) or QIAamp viral RNA Minikit (Qiagen, Hilden Germany).  
128 Libraries for whole-genome sequencing of SARS-CoV-2 were generated using the protocol  
129 developed by the ARTIC Network (<https://artic.network/2-protocols.html>) or a long-  
130 amplicon-based method [18]. Libraries were sequenced on a MiSeq sequencing platform  
131 using a 2x150-cycle or a NextSeq 500 platform using 2x150-cycle mid-output kits to obtain  
132 paired-end reads (Illumina, San Diego, CA, USA). The DRAGEN COVIDSeq Test  
133 Pipeline on BaseSpace Sequence Hub performed the analysis, mapping, and consensus.

134

#### 135 *Spike partial sequencing*

136 Partial sequencing of the Spike segment was performed by Sanger sequencing in samples  
137 with incomplete genome or samples with cycle threshold (Ct) values above 28. Briefly, 956  
138 bp amplicons (944-1900 nucleotide sequence, 315-633 aa) were obtained using specific  
139 primers for SARS-CoV-2:

140 SF3 CTTCTAACTTTAGAGTCCAACC and SR4 GCCAAGTAGGAGTAAGTTGAT.

141 The amplicons were sequenced in both directions with the same primers. Sequencing  
142 reactions were performed with BigDye Terminator v3.1 (Life Technologies, Carlsbad, CA)  
143 as instructed by the manufacturer. Sequences were obtained by capillary electrophoresis  
144 using an ABI Prism 3500 Genetic Analyzer (Life Technologies) and were assembled using  
145 MEGA 10.0 [19]. The sequences mentioned above can be found at GenBank (accession  
146 numbers: ON158371-ON158443).

147

148

149

150 **Phylogenetic analysis**

151 To perform a phylogenetic analysis, we analyzed only samples with complete genomes of  
152 hospitalized and ambulatory patients from our cohort (N= 311). In addition, for the  
153 genomic surveillance, 219 complete Mexican genomes available in the GISAID platform,  
154 including 140 sequences of INER from May 2020 to November 2020, 42 and 37 sequences  
155 of different States of Mexico from March 2020 to November 2020, and March 2021 to  
156 September 2021 respectively were used. Also, we included 10 USA sequences from  
157 January 2020 to November 2021 and one Wuhan 2019 sequence for reference. To construct  
158 the analysis, we selected only the Spike sequences of these 541 sequences. Sequence  
159 alignments were created with MAFFT V7 [20] and edited with MEGA 10.0. A maximum-  
160 likelihood tree was constructed for the whole Spike sequence using MEGA 10.0. The  
161 General Time-Reversible (GTR) model was selected with 5-parameter gamma-distributed  
162 rates and 1,000 bootstrap replicates. Edition of the trees was made using FigTree [21].

163

164 **Statistical analyses**

165 To evaluate the impact on clinical outcomes, we divided our cohort into three groups: 1)  
166 unvaccinated: defined as those patients who had never received a SARS-CoV-2 vaccine; 2)  
167 partially vaccinated: defined as those patients who had not yet completed the standard  
168 vaccination schedule (depending on the vaccine) or had received the last dose less than 14  
169 days before symptom onset; and 3) fully vaccinated: defined for those patients who had  
170 already completed the vaccination schedule and with more than 14 days after the last dose.  
171 As advanced age is a significant driver of severe COVID-19 [22]; we categorized patients  
172 into three groups: <30 years old, 31-60 years old, and > 61 years old. In addition, the  
173 severity of the disease was categorized according to the NIH COVID-19 treatment

174 guidelines [23] into four groups: 1) Mild illness: individuals who have any of the various  
175 signs and symptoms of COVID-19 (e.g., fever, cough, sore throat, malaise, headache,  
176 muscle pain, nausea, vomiting, diarrhea, loss of taste, and smell) but who do not have  
177 shortness of breath, dyspnea, or abnormal chest imaging, 2) Moderate illness: individuals  
178 who show evidence of lower respiratory disease during clinical assessment or imaging and  
179 who have an oxygen saturation ( $SpO_2$ )  $>94\%$  on room air at sea level, 3) Severe illness:  
180 individuals who have  $SpO_2 <94\%$  on room air at sea level, a ratio of arterial partial pressure  
181 of oxygen to fraction of inspired oxygen ( $PaO_2/FiO_2$ )  $<300$  mmHg, a respiratory rate  $>30$   
182 breaths/min, or lung infiltrates in  $>50\%$  of the lung fields, and 4) Critical illness:  
183 individuals who have respiratory failure, septic shock, or multiple organ dysfunction.  
184 All statistical analyses were performed using R v4.0.2 in RStudio v1.3.1 [24] and the  
185 packages ggplot2 (v3.3.3) [25], stats (v3.6.2) [24], survival (v3.2.13) [26], and survminer  
186 (v0.4.9) [27]. We used stacked bar plots, density plots, pie charts, or heatmaps constructed  
187 in the ggplot2 package to represent data proportion. For numerical data representation, we  
188 used boxplots constructed in the ggplot2 package. For all cases, categorical variables were  
189 statistically compared using Chi-square or Fisher's exact test and continuous variables using  
190 Wilcoxon rank-sum test in R base.  
191 To predict the clinical outcome (deceased vs. recovered) we constructed Generalized Linear  
192 Models (GLM) using a Binomial family with a *logit* link in R base. We fitted one model as  
193 a function of vaccination status and another model as a function of clinical parameters.  
194 Both models were adjusted by comorbidities, age, and sex. Odds ratios and 95% CI for all  
195 selected variables were calculated and plotted in the final model. Finally, to detect variables  
196 that significantly affect survival probability, we calculated Kaplan-Meier curves coupled  
197 with the Cox proportional hazard models to determine factors affecting survival, using the



198 survival package and plotted with the survminer package. We used the hospitalization  
199 length in days as a time variable for all curves, the outcome (deceased or recovered)  
200 standardized at 28 days as a dependent variable, and the tested variables as exposure.  
201 Finally, for both the GLM and the Kaplan-Meier curves, we categorized the numerical  
202 variables (e.g., age, D dimer.) into three groups according to the data distribution: 1) all  
203 values under the 25th percentile, 2) values between the 25th and 75th percentiles, and 3)  
204 values above the 75th percentile.

205

206

207

208

209

210

211

212

213

214

215

216

217

218

219

220

221

## 222 **RESULTS**

### 223 **Clinical and demographic characteristics of the cohort**

224 A total of 1014 patients admitted to INER from March to September 2021 positive for  
225 SARS-CoV-2 infection were included. 124 (12%) were outpatients, and 890 (88%) were  
226 hospitalized due to respiratory failure. 48 patients in the cohort had incomplete information;  
227 thus, only 111 out of 124 outpatients and 855 out of 890 hospitalized patients had their  
228 clinical and demographic data analyzed (Table 1).

229

230 For outpatients, the median age was 39.5 years (IQR: 30-52), 47.7% were female, and 64%  
231 of the patients were either partially (28.8%) or fully (36%) vaccinated. The most frequently  
232 administered vaccine in fully vaccinated patients was Pfizer (70%), followed by Sinovac  
233 (12%) and AstraZeneca (10%). The most commonly administered vaccines in partially  
234 vaccinated patients were AstraZeneca (40.6%) and Pfizer (37%). 13.5% of the patients had  
235 at least one comorbidity, obesity being the most common (14.4%), particularly in  
236 unvaccinated (12.8%) and partially vaccinated (21.8%). For fully vaccinated outpatients,  
237 the most common comorbidity was hypertension (12.5%). Only eight patients received  
238 dexamethasone (7%) as in-hospital treatment, with the highest prevalence in the  
239 unvaccinated group (12.8%). Among the outpatients, unvaccinated patients reported fever  
240 (48.7%, Chi-square test,  $p = 0.01$ ) and headache (33.3%, Chi-square test,  $p = 0.01$ ) more  
241 frequently than vaccinated individuals. While partially vaccinated patients reported a higher  
242 prevalence of arthralgias (31.2%, Chi-square test,  $p = 0.002$ ). Diarrhea was less frequently  
243 reported in partially vaccinated patients (3.1%, Chi-square test,  $p = 0.01$ ). The rest of the  
244 symptoms were equally reported.

245

**Table 1. Demographics of the cohort.**

|                                     | Outpatients (N=111)         |                                     |                                |        | Hospitalized (N=855)         |                                      |                                  |        |
|-------------------------------------|-----------------------------|-------------------------------------|--------------------------------|--------|------------------------------|--------------------------------------|----------------------------------|--------|
|                                     | Unvaccinated (N=39) [35.1%] | Partially vaccinated (N=32) [28.8%] | Fully vaccinated (N= 40) [36%] | P      | Unvaccinated (N=572) [66.9%] | Partially vaccinated (N=178) [20.8%] | Fully vaccinated (N=105) [12.2%] | P      |
| <b>Age</b>                          |                             |                                     |                                |        |                              |                                      |                                  |        |
| <30, n (%)                          | 13 (33.3%)                  | 4 (12.5%)                           | 14 (35%)                       | 0.03   | 54 (9.4%)                    | 1 (0.5%)                             | 0                                | <0.001 |
| 31-60, n (%)                        | 25 (64.1%)                  | 22 (68.7%)                          | 18 (45%)                       | 0.04   | 382(66.7%)                   | 132 (74.1%)                          | 21 (20%)                         | <0.001 |
| =/>60, n (%)                        | 1 (2.50%)                   | 6 (18.7%)                           | 8 (20%)                        | 0.03   | 135(23.6%)                   | 45 (25.2%)                           | 82 (78%)                         | <0.001 |
| NA                                  | 0                           | 0                                   | 0                              |        | 1                            | 0                                    | 2                                |        |
| <b>Gender</b>                       |                             |                                     |                                |        |                              |                                      |                                  |        |
| Female, n (%)                       | 17 (43.5%)                  | 20 (62.5%)                          | 16 (40%)                       | ns     | 200(34.9%)                   | 65 (36.5%)                           | 52 (49.5%)                       | 0.02   |
| NA                                  | 0                           | 0                                   | 0                              |        | 0                            | 0                                    | 0                                |        |
| <b>Vaccine type</b>                 |                             |                                     |                                |        |                              |                                      |                                  |        |
| Total of vaccinated patients        |                             | 32 (100%)                           | 40 (100%)                      |        |                              | 179 (100%)                           | 104 (100%)                       |        |
| Pfizer, n (%)                       | na                          | 12(37%)                             | 28 (70%)                       | 0.01   | na                           | 34 (19%)                             | 14 (13.3%)                       | ns     |
| AztraZeneca, n (%)                  | na                          | 13(40.6%)                           | 4 (10%)                        | 0.02   | na                           | 69 (38.7%)                           | 15 (14.2%)                       | <0.001 |
| SinoVac, n (%)                      | na                          | 3 (9.3%)                            | 5 (12%)                        | ns     | na                           | 18 (10.1%)                           | 35 (33.3%)                       | <0.001 |
| Sputnik, n (%)                      | na                          | 2 (6.2%)                            | 2 (5%)                         | ns     | na                           | 51 (28.6%)                           | 21 (20%)                         | ns     |
| Cansino, n (%)                      | na                          | 0                                   | 1 (2.5%)                       | na     | na                           | na                                   | 18 (17.1%)                       | na     |
| J&J, n (%)                          | na                          | 0                                   | 0                              | na     | na                           | 1 (0.56%)                            | 0                                | ns     |
| Moderna, n (%)                      | na                          | 0                                   | 0                              | na     | na                           | 0                                    | 1 (0.95%)                        | ns     |
| NA                                  | na                          | 2                                   | 0                              |        | na                           | 5                                    | 1                                |        |
| <b>Comorbidities</b>                |                             |                                     |                                |        |                              |                                      |                                  |        |
| Diabetes, n (%)                     | 2 (5.1%)                    | 4 (12.5%)                           | 1 (2.5%)                       | ns     | 115 (20.1%)                  | 44 (24.7%)                           | 42 (40%)                         | <0.001 |
| Hypertension, n (%)                 | 5 (12.8%)                   | 4 (12.5%)                           | 5 (12.5%)                      | ns     | 147 (25.6%)                  | 45 (25.2%)                           | 53 (53.3%)                       | <0.001 |
| Obesity, n (%)                      | 5 (12.8%)                   | 7 (21.8%)                           | 4 (10%)                        | ns     | 255 (44.5%)                  | 82 (46%)                             | 47 (44.7%)                       | ns     |
| Smoking, n (%)                      | 2(5.1%)                     | 1 (3.1%)                            | 2 (5%)                         | ns     | 177 (30.9%)                  | 57 (32%)                             | 25 (23.8%)                       | ns     |
| COPD, n (%)                         | 0                           | 0                                   | 2 (5%)                         | na     | 12 (2%)                      | 2 (1.1%)                             | 4 (3.8%)                         | ns     |
| Immune disease, n (%)               | 0                           | 0                                   | 2 (5%)                         | na     | 12 (2%)                      | 1 (0.5%)                             | 3 (2.8%)                         | ns     |
| NA                                  | 89                          | 85                                  | 105                            |        | 33                           | 13                                   | 10                               |        |
| <b>Number of comorbidities</b>      |                             |                                     |                                |        |                              |                                      |                                  |        |
| None, n (%)                         | 22 (56.4%)                  | 13 (40.6%)                          | 25 (62.1%)                     | 0.05   | 97 (16.9%)                   | 34 (19.1%)                           | 10 (9.5%)                        | 0.05   |
| 1, n (%)                            | 9 (23.07%)                  | 2 (6.2%)                            | 4 (10%)                        | ns     | 217 (37.9%)                  | 58 (32.5%)                           | 21 (20%)                         | <0.001 |
| 2, n (%)                            | 2 (5.1%)                    | 1 (3.1%)                            | 4 (10%)                        | ns     | 170 (29.7%)                  | 55 (30.8%)                           | 35 (33.3%)                       | ns     |
| =/> 3, n (%)                        | 1 (2.5%)                    | 3 (9.3%)                            | 2 (5%)                         | ns     | 87 (15.2%)                   | 31 (17.4%)                           | 39 (37.1%)                       | <0.001 |
| NA                                  | 5                           | 13                                  | 5                              |        | 1                            | 0                                    | 0                                |        |
| <b>In-hospital treatment</b>        |                             |                                     |                                |        |                              |                                      |                                  |        |
| Dexamethasone, n (%)                | 5 (12.8%)                   | 2 (6.2%)                            | 1 (2.5%)                       | ns     | 554 (96.8%)                  | 169 (94.9%)                          | 98 (93.3%)                       | ns     |
| Remdesivir./Baricitinib, n (%)      | 0                           | 0                                   | 0                              | na     | 11 (1.9%)                    | 3 (1.6%)                             | 3 (2.8%)                         | 0.02   |
| Remdesivir/Dexamethasone,n(%)       | 0                           | 0                                   | 0                              | na     | 4 (0.6%)                     | 0                                    | 1 (0.95%)                        | ns     |
| Dexamethasone./Baricitinib, n (%)   | 0                           | 0                                   | 0                              | na     | 1 (0.1%)                     | 2 (1.1%)                             | 0                                | ns     |
| NA                                  | 5                           | 13                                  | 6                              |        | 0                            | 0                                    | 2                                |        |
| <b>Previous steroid</b>             |                             |                                     |                                |        |                              |                                      |                                  |        |
| Dexamethasone, n (%)                | 0                           | 0                                   | 0                              | na     | 202 (35.3%)                  | 66 (37%)                             | 40 (38%)                         | ns     |
| Prednisone, n (%)                   | 0                           | 0                                   | 0                              | na     | 28 (4.8%)                    | 0                                    | 5 (4.7%)                         | 0.001  |
| Betamethasone, n (%)                | 0                           | 0                                   | 0                              | na     | 12 (2%)                      | 7 (3.9%)                             | 2 (1.9%)                         | ns     |
| Dexamethasone./Prednisone, n (%)    | 0                           | 0                                   | 0                              | na     | 6 (1.04%)                    | 2 (1.1%)                             | 0                                | ns     |
| Dexamethasone./Betamethasone, n (%) | 0                           | 0                                   | 0                              | na     | 5 (0.87%)                    | 4 (2.2%)                             | 0                                | ns     |
| NA                                  | 5                           | 13                                  | 6                              |        | 0                            | 0                                    | 2                                |        |
| <b>Symptoms</b>                     |                             |                                     |                                |        |                              |                                      |                                  |        |
| Fever, n (%)                        | 19 (48.7%)                  | 10 (31.2%)                          | 12 (30%)                       | 0.01   | 409 (71.5%)                  | 134 (75.2%)                          | 57 (54.2%)                       | <0.001 |
| Cough, n (%)                        | 19 (48.7%)                  | 19 (59.3%)                          | 15 (37.5%)                     | ns     | 333 (58.2%)                  | 107 (60.1%)                          | 68 (64.7%)                       | ns     |
| Diarrhea, n (%)                     | 4 (10.2%)                   | 1 (3.1%)                            | 4 (10%)                        | 0.01   | 61 (10.6%)                   | 17 (9.5%)                            | 6 (5.7%)                         | ns     |
| Myalgias, n (%)                     | 9 (23%)                     | 7 (21.8%)                           | 11 (27.5%)                     | ns     | 382 (66.7%)                  | 111 (62.3%)                          | 65 (61.9%)                       | ns     |
| Arthralgias, n (%)                  | 10 (25.6%)                  | 10 (31.2%)                          | 8 (20%)                        | 0.002  | 163 (28.4%)                  | 47 (26.4%)                           | 24 (22.8%)                       | ns     |
| Nasal congestion, n (%)             | 0                           | 0                                   | 2 (5%)                         | na     | 51 (8.9%)                    | 21 (11.7%)                           | 11 (10.4%)                       | ns     |
| Pharyngodynia, n (%)                | 7 (17.9%)                   | 7 (21.8%)                           | 11 (27.5%)                     | ns     | 140 (24.4%)                  | 57 (32%)                             | 29 (27.6%)                       | 0.05   |
| Anosmia, n (%)                      | 2 (5.1%)                    | 3 (9.3%)                            | 2 (5%)                         | ns     | 43 (7.5%)                    | 14 (7.8%)                            | 3 (2.8%)                         | ns     |
| Headache, n (%)                     | 13 (33.3%)                  | 7 (21.8%)                           | 13 (32.5%)                     | <0.001 | 190 (33.2)                   | 60 (33.7%)                           | 33 (31.4%)                       | ns     |
| NA                                  | 5                           | 20                                  | 14                             |        | 0                            | 0                                    | 18                               |        |

247 **COPD:** Chronic obstructive pulmonary disease

248 **NA:** Data not available

249 P values were obtained from Chi-square or Fisher exact test.

250 **ns=** non-significant, **na=** not available comparison.

251

252

253

254

255

256 For hospitalized patients, the median age was 52 (IQR: 41-64), and 37% were female. Most  
257 patients were unvaccinated (66.9%), while 20.8% were partially vaccinated and 12.2%  
258 were fully vaccinated. For fully vaccinated patients, the most frequently administered  
259 vaccines were Sinovac (33.3%), Sputnik (20%), and Cansino (17.1%), while for partially  
260 vaccinated patients, AstraZeneca (38.7%), Sputnik (28.6%), and Pfizer (19%) were the  
261 most frequently administered. 34.6% had at least one comorbidity. Obesity was the most  
262 frequent comorbidity in the three compared groups (unvaccinated: 44.5%, partially  
263 vaccinated: 46%, and fully vaccinated: 44.7%). In general, fully vaccinated patients were  
264 significantly older (median: 70, Chi-square test  $p < 0.001$ ) and showed higher prevalence of  
265 diabetes (40%, Chi-square test  $p < 0.001$ ), hypertension (53.3%, Chi-square test  $p < 0.001$ ),  
266 and three or more comorbidities (37.1%, Chi-square test  $p < 0.001$ ). Above 90% of  
267 hospitalized patients (regardless of the vaccination status) received in-hospital treatment,  
268 being dexamethasone the most administered (unvaccinated: 96.8%, partially vaccinated:  
269 94.9%, and fully vaccinated: 93.3%). Fever and pharyngodinia were more frequently  
270 reported by partially vaccinated patients (75.2% and 32%, respectively, Chi-square test,  $p <$   
271 0.05). The rest of the symptoms were equally reported.

272 Furthermore, we found no differences in the radiological patterns between study groups.  
273 Most of the patients presented a crazy-paving pattern regardless of the vaccination status  
274 (unvaccinated: 57.6%, partially vaccinated: 67.4%, fully vaccinated: 68.5%), while the least  
275 showed pattern was consolidation (unvaccinated: 6.2%, partially vaccinated: 3.3%, fully  
276 vaccinated: 4.8%).

277

278

279 **Impact of vaccination status and age on the severity and clinical parameters of**  
280 **COVID-19 patients**

281 We compared the distribution of COVID-19 severity, severity indexes, O<sub>2</sub> requirement, and  
282 laboratory parameters among patients with different vaccination status and age (Fig. 1-2).

283 Overall, due to the timing of the vaccination campaign in Mexico, most of the vaccinated  
284 patients were received from June to August, while unvaccinated patients arrived at the  
285 hospital in equal proportion during the sampling months (Suppl. Fig. S1).

286 In general, we found that a large proportion of patients were classified either as severe or  
287 critical, regardless of age and vaccination status (Fig. 1A). Nonetheless, the highest  
288 proportion of patients with mild disease was found in fully vaccinated patients under 30  
289 years old (Suppl. Table S1, Chi-square test  $p < 0.001$ ), while the highest proportion of  
290 critical patients were unvaccinated older than 61 years old (Suppl. Table S1, Chi-square test  
291  $p < 0.001$ ). It is essential to highlight that for older patients (>61 years) the vaccination  
292 status seems to be associated with less disease severity, reducing the number of critical  
293 patients (Suppl. Table S1, unvaccinated against vaccinated patients; Chi-square test  $p =$   
294  $0.001$ ) and slightly increasing the number of patients with mild disease in the vaccinated  
295 groups (Suppl. Table S1, Chi-square test  $p < 0.002$ ). Furthermore, we do not find statistical  
296 differences in the most commonly used ICU scales (Fig. 1B) (SOFA and APACHE II).  
297 Nonetheless, we detected that, although most of the patients were subjected to mechanical  
298 ventilation, the highest proportion of intubated patients was in the unvaccinated group (Fig.  
299 1C).

300

301

302

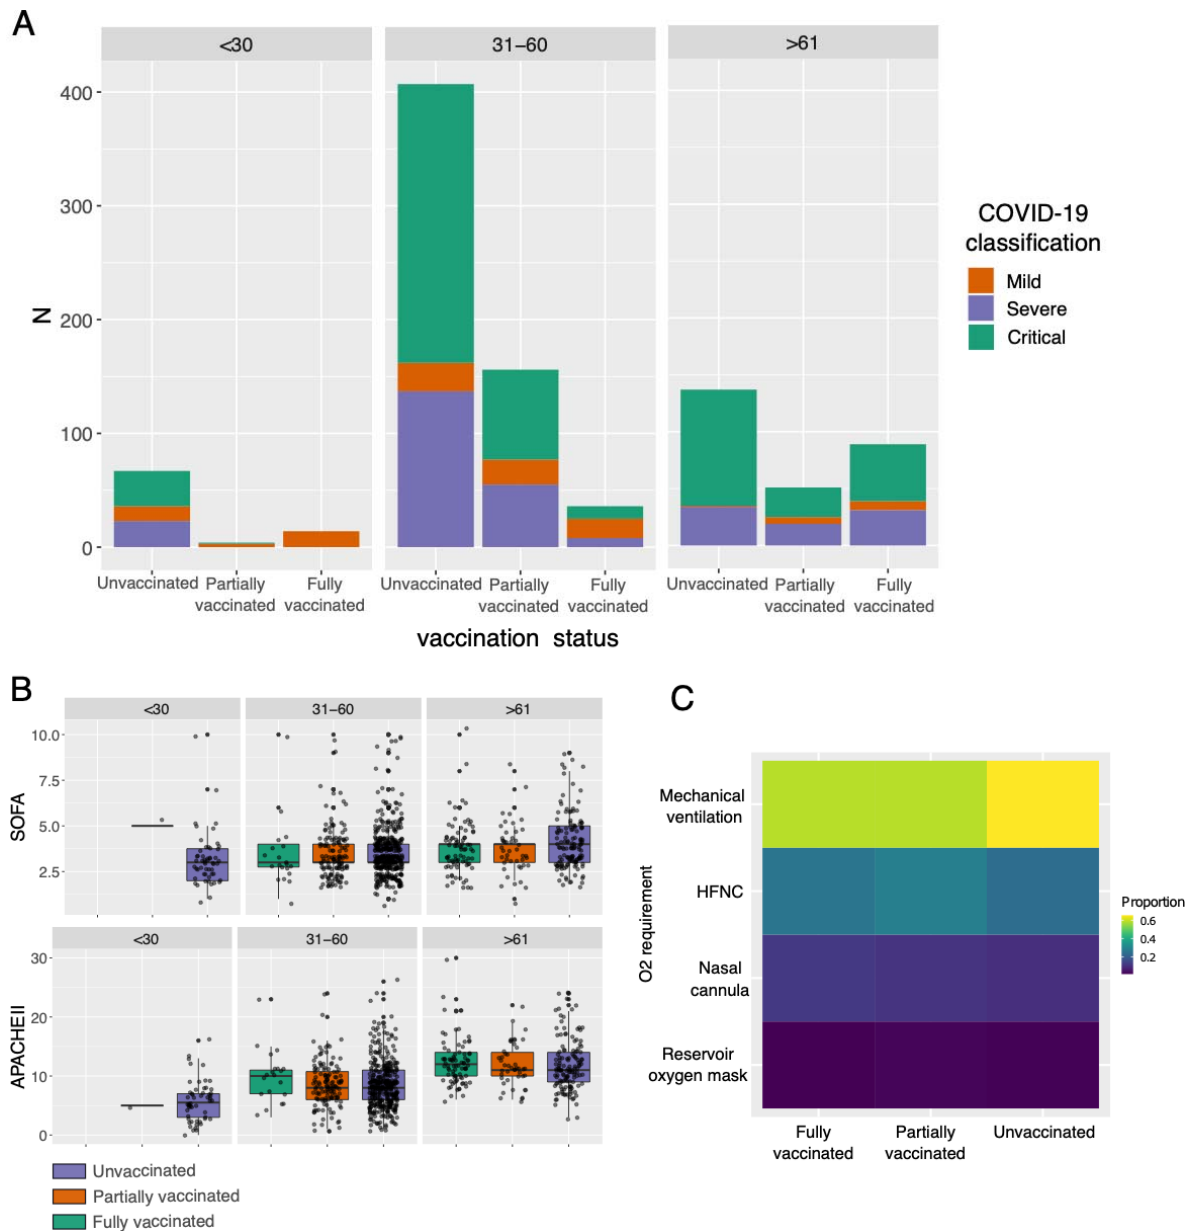

303

304 **Figure 1. Impact of vaccination status and age in severity and clinical parameters in COVID-19**

305 **patients A.** Barplot shown the proportion of COVID-19 severity classification among unvaccinated,

306 partially vaccinated, and fully vaccinated patients between age groups. Statistically significant

307 differences are available in Supplementary Table S1. **B.** Boxplot of Sequential Organ Failure

308 Assessment (SOFA) score and Acute Physiology and Chronic Health Evaluation II (APACHE) among

309 patients with different vaccination status and age. **C.** Heatmap of the O<sub>2</sub> requirement among patients

310 with different vaccination status. HFNC: High Flow Nasal Cannula.

311 Finally, we also investigated whether patients with different vaccination status and age  
312 differ in laboratory parameters (Fig. 2). The most remarkable differences were found in the  
313 unvaccinated group, particularly when comparing patients <30 years with >61 years. For  
314 instance, we found that, regardless of the vaccination status, patients older than 61 years  
315 exhibited the highest values for blood urea nitrogen (BUN), urea, creatinine (only  
316 statistically significant in unvaccinated patients), and D-dimer. In addition, patients in the  
317 age groups of <30 and 31-60 showed the highest values for lymphocytes, hematocrit, and  
318 albumin (only statistically significant in unvaccinated patients).  
319

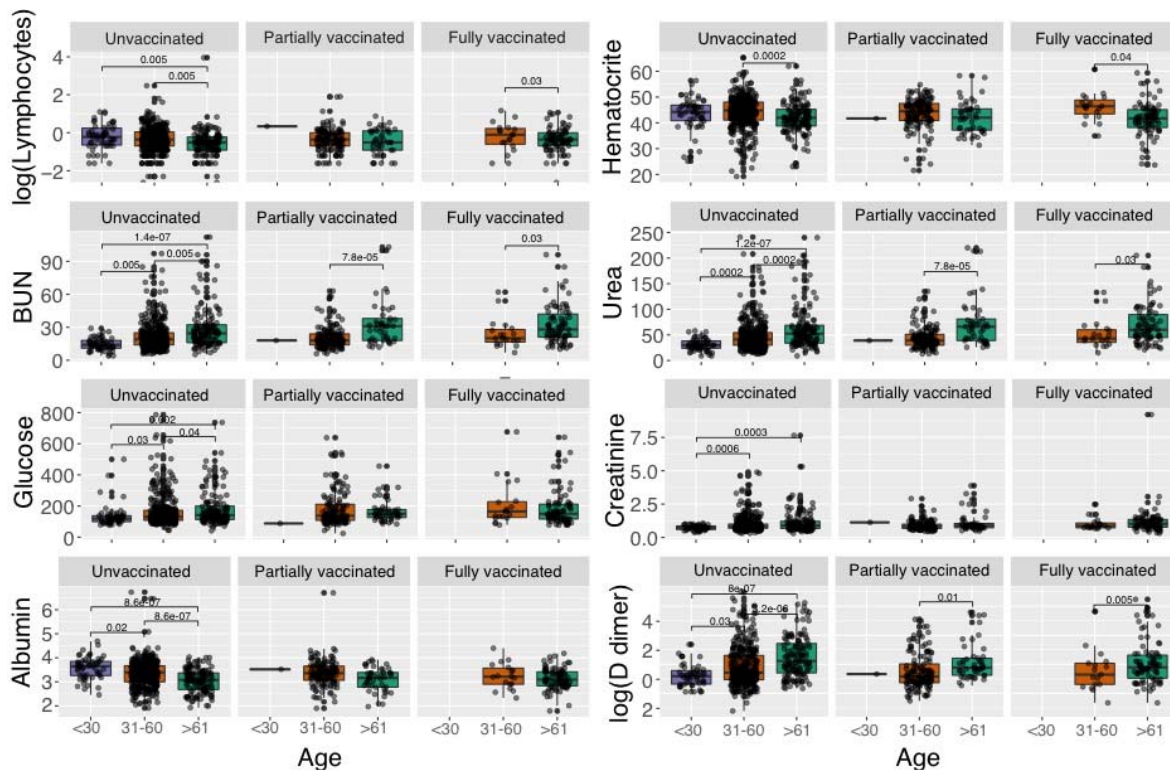

320  
321 **Figure 2. Laboratory parameters that significantly vary among vaccination status and age group.** We  
322 used logarithmic distribution in the lymphocytes and D dimer parameters for visualization purposes.  
323 Statistically significant differences are given by Wilcoxon rank-sum test. Units: Lymphocytes ( $10^3/\text{mm}^3$ ),  
324 Blood Urea Nitrogen (BUN) (mg/dL), Glucose (mg/dL), Albumin (g/dL), Hematocrit (%), Urea (mg/dL),  
325 Creatinine (mg/dL), D dimer (mg/dL).

## 326 **Impact of different vaccines on the severity of the disease**

327 By September 2021, more than 100 million doses of seven different vaccines were  
328 administered in the Mexican territory, with AstraZeneca (42.9%), Pfizer (32.6%), Sinovac  
329 (19.7%), and Sputnik (9.7%) being the most common (Fig. 3A). This heterogeneity of  
330 vaccine strategies is also found in our cohort, where 142 patients were fully vaccinated with  
331 five different vaccines being Pfizer (29.5%), Sinovac (28.1%), Sputnik (16.1%),  
332 AstraZeneca (13.3%), and Cansino (11.9%) the most administered (Fig. 3B). This allowed  
333 us to analyze the effect of the different vaccines on the severity of the disease. To isolate  
334 the age effect (Suppl. Figure S2), we kept only fully vaccinated patients above 61 years old  
335 (N=88) and tested for differences in the severity of the disease, O<sub>2</sub> requirement, and  
336 severity indexes (Fig. 3C-E). Regarding COVID-19 classification, we found that all  
337 patients vaccinated with AstraZeneca (N=12) or Cansino (N=7) coursed a severe or critical  
338 disease without patients in the mild disease group (Fig. 3C), although this may be due to  
339 small sample sizes. Also, we found the highest proportion of patients with mild disease in  
340 the Pfizer group (Fig. 3C and Suppl. Table S2) (16.6%, Chi-square test  $p = 0.02$ ).  
341 Furthermore, patients vaccinated with AstraZeneca, Sinovac, and Sputnik had mostly a  
342 critical disease (66%, 51.4%, and 59%, respectively). Regarding O<sub>2</sub> requirement, although  
343 most of the patients were subjected to mechanical ventilation, AstraZeneca was the group  
344 with the highest proportion (66%). Pfizer was the group with the highest proportion of  
345 patients with a nasal cannula (16.6%, Chi-square test  $p = 0.01$ ), and the Cansino group had  
346 the highest proportion of high flow nasal cannula (HFNC) (42.8%, Chi-square test  $p =$   
347 0.01). Finally, we found that the Sinovac group had significantly higher values for SOFA  
348 (Fig.3E) compared to Pfizer (Wilcoxon rank-sum test,  $p = 0.01$ ) and AstraZeneca



349 (Wilcoxon rank-sum test,  $p = 0.02$ ). We did not find statistically significant differences in  
 350 the APACHE II severity index.

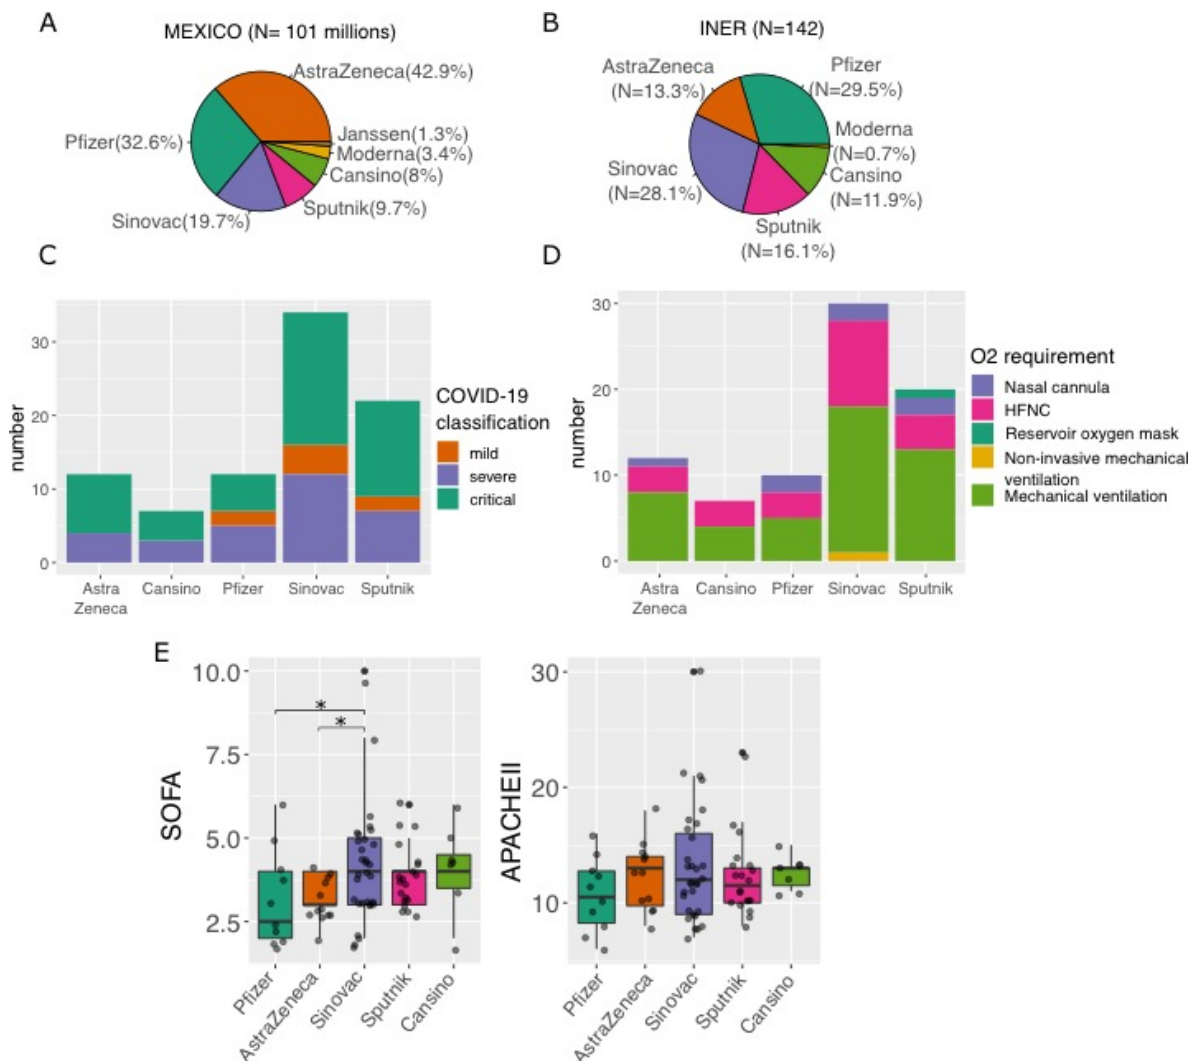

351

352 **Figure 3. Distribution of vaccine strategies and their impact on disease severity in fully vaccinated**

353 **patients.** **A.** Piechart of the proportion of the vaccines applied at the national level. **B.** Piechart of the

354 proportion of the different vaccines applied at the INER. **C.** Barplot shown the proportion of COVID-19

355 classification in patients with different vaccines. **D.** Barplot depicting the proportion of O<sub>2</sub> requirement in

356 patients with different vaccines. **E.** Boxplot of Sequential Organ Failure Assessment (SOFA) score and Acute

357 Physiology and Chronic Health Evaluation II (APACHE) among patients with different vaccines. Statistically

358 significant differences are available in Supplementary Table S2-3. In C-E panels only patients >61 years old

359 were included.

360 **Clinical factors affecting COVID-19 clinical outcome**

361 Of the hospitalized patients, 77.1% were discharged fully recovered, while 21.2% died due  
 362 to complications (Table 2), with the highest proportion of deceased patients in the  
 363 unvaccinated group (70.8%). Regarding severity indexes, fully vaccinated patients had the  
 364 highest median of APACHE II (median: 11, Wilcoxon rank-sum test,  $p < 0.001$ ). Most of  
 365 the patients were subjected to supplemental oxygen, with mechanical ventilation  
 366 (unvaccinated: 65.5%, partially vaccinated: 58.9%, fully vaccinated: 58%), HFNC  
 367 (unvaccinated: 23.6%, partially vaccinated: 28.4%, fully vaccinated: 26.6%), and nasal  
 368 cannula (unvaccinated: 9.4%, partially vaccinated: 10.6%, fully vaccinated: 11.4%) being  
 369 the most common.

370

371 **Table 2. Outcome, severity indexes, and O<sub>2</sub> requirement among hospitalized patients**  
 372 **with different vaccination status.**

|                                            | Hospitalized (N=855)               |                                            |                                        | P value          |
|--------------------------------------------|------------------------------------|--------------------------------------------|----------------------------------------|------------------|
|                                            | Unvaccinated<br>(N=572)<br>[66.9%] | Partially<br>vaccinated<br>(N=178) [20.8%] | Fully<br>vaccinated<br>(N=105) [12.2%] |                  |
| <b>Outcome</b>                             |                                    |                                            |                                        |                  |
| Recovered, n (%)                           | 433 (71.6%)                        | 139 (78%)                                  | 88 (83.8%)                             | <b>0.05</b>      |
| Deceased, n (%)                            | 129 (22.5%)                        | 37 (20.7%)                                 | 16 (15.2%)                             | <i>ns</i>        |
| NA                                         | 10                                 | 2                                          | 1                                      |                  |
| <b>Severity indexes</b>                    |                                    |                                            |                                        |                  |
| APACHE II, med(IQR)                        | 8.5 (6-11)                         | 9 (6.2-11)                                 | 11 (9-14)                              | <b>&lt;0.001</b> |
| SOFA, med(IQR)                             | 3 (3-4)                            | 3 (3-4)                                    | 4 (3-4)                                | <i>ns</i>        |
| GLASGOW, med(IQR)                          | 15 (15-15)                         | 15 (15-15)                                 | 15 (15-15)                             | <i>ns</i>        |
| <b>O<sub>2</sub> requirement</b>           |                                    |                                            |                                        |                  |
| Nasal cannula, n (%)                       | 54 (9.4%)                          | 19 (10.6%)                                 | 12 (11.4%)                             | <i>ns</i>        |
| HFNC, n (%)                                | 135 (23.6%)                        | 50 (28%)                                   | 28 (26.6%)                             | <i>ns</i>        |
| Mechanical ventilation, n (%)              | 375 (65.5%)                        | 105 (58.9%)                                | 61 (58%)                               | <i>ns</i>        |
| Reservoir oxygen mask, n (%)               | 7 (1.2%)                           | 3 (1.6%)                                   | 1 (0.9%)                               | <i>ns</i>        |
| Non-invasive mechanical ventilation, n (%) | 1 (0.1%)                           | 1 (0.5%)                                   | 1 (0.9%)                               | <i>ns</i>        |
| NA                                         | 0                                  | 0                                          | 2                                      |                  |

373 **NA:** Data not available

374 P values were obtained from Chi-square or Fisher exact test.

375 *ns*= non-significant, *na*= not available comparison.

376

377

378

379 Moreover, we applied multivariate statistical approaches to determine the factors that could  
 380 explain mortality in COVID-19 patients. From the two fitted Generalized Linear Model  
 381 (GLM) (Fig. 4A), we found that the presence of immune disease (OR: 3.12, 95% CI: 1.09-  
 382 8.34,  $p = 0.02$ ), age above 61 years old (OR: 3.51, 95% CI: 2.3-5.2,  $p = 5.9e-10$ ), platelets  
 383 count under  $175 \times 10^9/l$  (OR: 1.49, 95% CI: 0.98-2.2,  $p = 0.05$ ), lactate dehydrogenase  
 384 (LDH)  $> 600$  u/L (OR: 1.89, 95% CI: 1.2-2.7,  $p = 0.001$ ), and D dimer  $> 1.8$  ug/mL (OR:  
 385 1.45, 95% CI: 0.98-2.1,  $p = 0.05$ ) were factors associated with higher probability of death.  
 386 While been fully vaccinated was associated with improved outcomes (OR: 0.25, 95% CI:  
 387 0.12-0.46,  $p = 2.89e-05$ ). Odds ratios and estimates for all variables in the model are  
 388 available in Supplementary Table S4. Finally, age was also found to correlate with  
 389 mortality (Cox test,  $p < 0.001$ ) in the Kaplan-Meier curves (Fig. 3C), as well as D-dimer  
 390 above  $1.87 \mu\text{g/mL}$  independently from vaccination or comorbidities (Cox test,  $p = 0.02$ ).

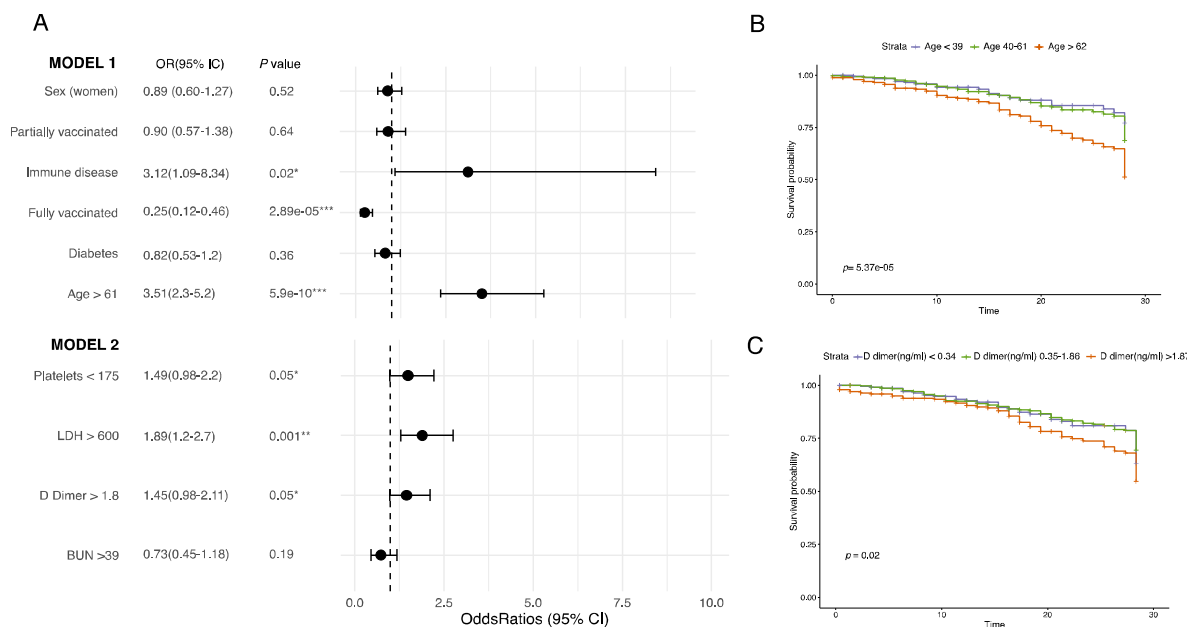

391  
 392 **Figure 4. Variables affecting outcome in COVID-19 patients.** A. Forest plot of the two fitted Generalized  
 393 Linear Model (GLM) representing the odds ratio and 95% IC for each variable. Estimates are available in  
 394 Supplementary Table S4. B. Kaplan-Meier curve depicting the survival probability of patients with different

395 age ranges. C. Kaplan-Meier curve depicting the survival probability of patients with different values for D  
396 dimer. All models were constructed using outcome (deceased or recovered) standardized at 28 days. Units:  
397 Platelets ( $\times 10^9/l$ ), Lactate dehydrogenase (LDH) (u/L), D dimer (ug/dL), and Blood Urea Nitrogen (BUN)  
398 (mg/dL).

399

#### 400 **SARS-CoV-2 lineages: phylogeny, distribution, and its impact on disease severity**

401 We identified the lineages of 386 (38%) samples by partial or complete genome sequencing  
402 (Table 3). From this subset of samples, we detected VOC such as Alpha (2.3%), Gamma  
403 (7.2%), Delta (68.6%), and Mu (3.6%), originally designated as VOI. We also detected  
404 sequences belonging to lineage B.1.1.519 (14.7%) and other lineages (2.86%). The  
405 distribution of lineages with a clear dominance of Delta, and in less proportion of B.1.1.519  
406 was also observed between March and September 2021 nationwide, as well as in the State  
407 of Mexico, and Mexico City (Fig.5A, statistical differences are available in Supplementary  
408 Table S5).

409 Furthermore, we also found differences in the distribution of SARS-CoV-2 lineages  
410 between outpatients and hospitalized patients (Table 3). In particular, we found the highest  
411 proportion of Delta variant in outpatients (82.5%, Chi-square test,  $p < 0.001$ ), while  
412 B.1.1.519 represented the highest proportion in hospitalized patients (19%, Chi-square test,  
413  $p = 0.001$ ). Notably, the SARS-CoV-2 variant distribution displayed temporal variations,  
414 with B.1.1.519 being more prevalent in March and April 2020, and Delta becoming the  
415 predominant lineage in July (Fig. 5C). Furthermore, we found a general increase in the  
416 proportion of vaccinated patients during the study period (Fig. 5D). These temporal  
417 variations make complex the analysis of potential associations between disease severity and  
418 lineages. It is worth mentioning that the number of critical and severe patients (green and

419 purple colors) seems to decrease as the vaccination increases (Fig. 5D). Altogether, we  
 420 found no significant association between disease severity and lineages (Supplementary Fig.  
 421 S3). Nonetheless, when analyzing the symptoms associated with patients infected with  
 422 different lineages, we noted that diarrhea tended to be associated more frequently with  
 423 B.1.1.519 infections (Fig. 5B).

424

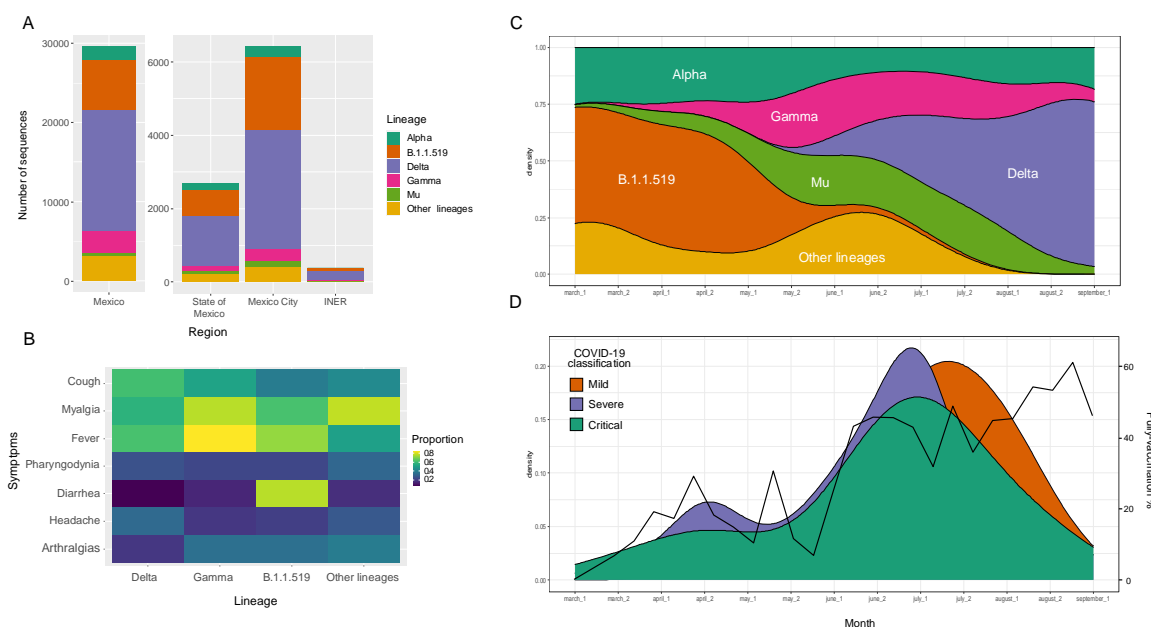

425

426 **Figure 5. SARS-CoV-2 lineages distribution and its impact on disease severity.** **A.** Distribution of SARS-  
 427 CoV-2 lineages at the country level (Mexico), Metropolitan area (the State of Mexico and Mexico City), and  
 428 our research center (INER). **B.** Heatmap of the principal symptoms among patients infected with the different  
 429 SARS-CoV-2 lineages. **C.** Dominance of lineages in our cohort along time (months). **D.** Distribution of  
 430 patients with either mild, severe, or critical COVID-19 classification and percentage of fully vaccinated  
 431 patients in our cohort through time (months).

432

433

434

435 **Table 3. SARS-CoV-2 lineages between outpatients and hospitalized patients.**

| Lineages         | Outpatients (N=123) | Hospitalized (N=263) | P value          |
|------------------|---------------------|----------------------|------------------|
| Alpha, n (%)     | 2 (1.5%)            | 7 (2.6%)             | <i>ns</i>        |
| Gamma, n (%)     | 4 (3.1%)            | 24 (9.1%)            | <i>ns</i>        |
| Delta, n (%)     | 104 (82.5%)         | 163 (61.9%)          | <b>&lt;0.001</b> |
| Mu, n (%)        | 3 (2.3%)            | 11 (4.1%)            | <i>ns</i>        |
| B.1.1.519, n (%) | 7 (5.5%)            | 50 (19%)             | <b>0.001</b>     |
| Other, n (%)     | 3 (2.3%)            | 8 (3.04%)            | <i>ns</i>        |

436 P values were obtained from Chi-square or Fisher exact test.

437

438 Finally, the phylogenetic analyses based on complete Spike sequences showed, as expected,  
439 a specific clustering by lineages, with the Delta variant representing 69% of the samples  
440 (Suppl. Figure S4). The sequences of patients with different vaccination statuses or severity  
441 classifications did not form specific clusters; suggesting no association between SARS-  
442 CoV-2 lineages and vaccination status or COVID-19 severity.

443

#### 444 **DISCUSSION**

445 Vaccines have significantly improved the COVID-19 survival rate around the world, but  
446 they are less effective at protecting from SARS-CoV-2 infections, leading to mostly mild  
447 infections in vaccinated individuals. Understanding the impact of viral variants, and host  
448 factors on disease severity is critical to guide COVID-19 vaccination campaigns and the  
449 implementation of protective measures. In this retrospective study, we analyzed the severity  
450 of COVID-19 infections in a group of individuals that had been vaccinated with all  
451 different types of vaccines applied to the Mexican population. We compared this group  
452 with unvaccinated individuals and performed additional analyses, including virological  
453 features obtained from genomic surveillance.

454

455

456

457 **Impact of host factors and vaccination status on COVID-19 severity**

458 It is known that host factors such as advanced age and the presence of comorbidities  
459 significantly worsen clinical outcomes for COVID-19 patients [28]. The Mexican  
460 population is characterized by a high prevalence of comorbidities [29], which is reflected in  
461 our cohort, with diabetes (20.5%), hypertension (25.5%), and obesity (39.4%) being the  
462 most common. Moreover, it is important to consider that the vaccination campaign in  
463 Mexico started at the end of 2020 and first focused on health care workers before moving  
464 on to individuals over 60, 50, and 40 years old in February, May, and June, respectively. As  
465 a result, in our cohort, the prevalence of comorbidities was even higher in fully vaccinated  
466 patients (Table 1), with more than 90% presenting at least one comorbidity, and over 75%  
467 were older than 60 years of age. Some studies have shown that the presence of  
468 comorbidities and advanced ages can also affect vaccines' effectiveness [12]. Moreover, in  
469 both COVID-19 [6,22,30] and Influenza disease [31], it has been shown that advanced age  
470 is related to a lower immune response to vaccination. Furthermore, a recent study showed  
471 that although vaccinated patients were less likely to present severe disease, vaccinated  
472 patients with comorbidities and older age developed severe disease [6]. This is similar to  
473 our study where we observed that fully vaccinated patients presented the highest values of  
474 severity on the APACHE II scale (Table 2). Nonetheless, when compared to unvaccinated  
475 individuals, the vaccinated group showed the lowest mortality rate (Table 2) and required  
476 mechanical ventilation less frequently (Fig.1C). These observations confirm that although  
477 the vaccine's protective effect may be reduced in individuals with risk factors, they still  
478 provide protection against fatal outcomes.

479

480 Moreover, we found that a significant proportion of patients had either severe or critical  
481 outcomes, regardless of age and vaccination status (Fig.1A). Although this could be a  
482 consequence of studying a cohort of patients in a tertiary hospital limited to the attention of  
483 critically ill individuals, it also could be the result of the presence of comorbidities and host  
484 genetic factors [32,33]. However, it is essential to highlight that the highest proportion of  
485 patients with mild disease was in those fully vaccinated and under 30 years of age (Suppl.  
486 Table S1), this evidences the combined protective effect of younger ages and complete  
487 vaccination schemes [34].

488 In addition, we analyzed laboratory parameters by vaccination status and age groups.  
489 Regardless of the vaccination status, patients older than 61 years exhibited the highest  
490 values for BUN, urea, creatinine, and D-dimer (Fig. 2). This is of special relevance since  
491 such parameters are known as markers of disease severity and are commonly found  
492 elevated in individuals with acute infections [35]. Moreover, urea, BUN, and creatinine are  
493 also markers for renal damage and acute kidney injury (AKI), which are conditions that  
494 strongly impact mortality [36]. Also, hypoalbuminemia, found in older COVID-19 patients,  
495 could be a manifestation of a pro-inflammatory state [37]. Finally, high levels of D-dimer  
496 have been found related to mortality in patients with infection or sepsis [38].

497

#### 498 **Impact of different vaccines on the severity of the disease**

499 It is important to point out that this study was not designed to assess vaccine effectiveness  
500 against COVID-19. However, Mexico is one of the few countries that used seven different  
501 vaccines, offering a unique opportunity to compare these vaccine types and to look for  
502 differences in severity and/or mortality. In this study, by analyzing solely patients above 61  
503 years old we found, in general, a high proportion of critical patients but low mortality rates



504 regardless of the vaccine applied (Suppl. Table S2). Nonetheless, our findings of lower  
505 SOFA index, a higher proportion of patients with mild disease, and higher usage of nasal  
506 cannula in patients vaccinated with the Pfizer vaccine may suggest a lower severity of  
507 disease in the group that received this vaccine. Some studies have shown that the  
508 vaccination efficacy of mRNA vaccines does not decrease in individuals with comorbidities  
509 [39]. Still, no causal associations can be made from this finding, and more investigations  
510 are needed to confirm if there is a difference in severity associated with the vaccines and  
511 what are the factors behind it.

512

### 513 **SARS-CoV-2 lineages and their impact on disease severity**

514 Understanding the impact of SARS-CoV-2 lineages on disease severity in both  
515 unvaccinated and vaccinated individuals is of major importance, especially since such  
516 variants could still emerge due to the evolution pressure driven by the population immunity  
517 [5,40,41]. As part of our genomic surveillance program, we characterized the circulating  
518 SARS-CoV-2 lineages at the time of the study and analyzed the disease severity and  
519 clinical presentation associated with infections caused by particular lineages. Alpha and  
520 B.1.1.519 were the predominant lineages from March to May 2021, with Delta becoming  
521 the most prevalent by July 2021. In addition, other variants such as Gamma and Mu were  
522 also detected, mainly between May and July 2021(Fig. 5- 6).

523 Furthermore, we detected a tendency in patients >60 years old infected with either Delta or  
524 B.1.1.519 lineages to course a more severe disease (Suppl. Figure S3). Although this  
525 finding was not statistically significant in our study, other studies have reported more  
526 severe disease in infections associated with these lineages [10,42]. In particular, mutations  
527 in the spike (S) protein of the virus which confer a higher affinity of the S1 domain to the

528 angiotensin converter enzyme 2 (ACE2) are one of the main reasons behind the higher  
529 pathogenicity of the Delta variant [42].  
530 Regarding symptomatology, there were no remarkable differences except for infections  
531 with the B.1.1.519 lineage, since patients reported diarrhea more frequently (Fig.5B). This  
532 contrasts with other studies where they found that fever, dyspnea, and sore throat were  
533 more prevalent in patients infected with Delta [6,43]. However, a previous study found that  
534 dyspnea, cyanosis, and particularly diarrhea were the most frequent symptoms in patients  
535 infected with the B.1.1.519 lineage in Mexico [10].  
536 Moreover, previous studies analyzing large datasets have found differences in disease  
537 severity among patients infected with different lineages [44,45]. Nonetheless, studies with  
538 small datasets have failed in detecting such differences [46,47]. Altogether, the reduced  
539 sample size and the temporal variation of the lineages may be affecting our results and  
540 hinder comparative analyses between lineages and vaccination status or disease severity.

541

#### 542 **Clinical factors affecting COVID-19 clinical outcome**

543 We determined the main factors that lead to fatal outcomes in our cohort. According to the  
544 fitted Generalized Linear Models (GLM) (Fig. 4), full vaccination was found to be a  
545 protective factor against death by COVID-19. On the contrary, platelets  $<175 \times 10^9/l$ , age  
546 above 61 years old, immune disease, D-dimer  $> 1.8 \text{ ug/mL}$ , and lactate dehydrogenase  
547 (LDH) above 600 u/L were found as risk factors. Notably, thrombocytopenia and high  
548 levels of LDH have been found associated with severe COVID-19 in other studies [48,49].  
549 Furthermore, contrary to other studies [50] we did identify advanced age as a risk factor  
550 itself in COVID-19 patients. It is known that the decline of physiologic functions and the  
551 immunosenescence associated with increasing age can negatively affect the host response

552 to infectious diseases [6,22,30]. Finally, we hypothesize that complete vaccination may  
553 diminish age negative effect since we found that despite that most of the fully vaccinated  
554 patients were >61 years old (78%), 83.3% were discharged from the hospital.  
555 Our study includes a considerable number of critical and severe patients enrolled, which  
556 allowed us to analyze the impact of vaccination, vaccine type, SARS-CoV-2 lineages, and  
557 several host factors on mortality and clinical presentation. However, the source is a single  
558 referral hospital, and a pandemic wave mostly by the Delta variant, preventing an analysis  
559 among vaccination status and lineages.

560

## 561 **CONCLUSIONS**

562 Comorbidities and advanced ages were the main risk factors, and complete vaccination  
563 schemes with different vaccine types (Pfizer, AstraZeneca, Cansino, SinoVac, and Sputnik)  
564 were the most significant protective factor against death by COVID-19. Moreover, we did  
565 not find strong associations between a particular lineage (Alpha, Gamma, B.1.1.519, and  
566 Delta) and disease severity, highlighting the predominant role of host factors such as age,  
567 comorbidities, and vaccination status on COVID-19 outcome.

568 Complete vaccination schemes for the whole population, are key to reducing both  
569 hospitalization and death. Nevertheless, public health policy should also focus on the  
570 control of comorbidities in the long term, which will improve clinical outcomes not only  
571 for COVID-19 but also for other current and emerging diseases. Genomic surveillance is  
572 essential to identify circulating VOC, which can help to guide the implementation of  
573 targeted epidemiological control measures and laboratory characterization for diagnostic  
574 and research purposes.

575

576 **Funding**

577 This work was financially supported by Consejo Nacional de Ciencia y Tecnología:  
578 CONACYT-FORDECYT 2020, Grant "Caracterización de la diversidad viral y bacteriana"  
579 to JAVP and by grant 057 from the "Ministry of Education, Science, Technology and  
580 Innovation (SECTEI) of Mexico City" (to CFA) and grant "Genomic surveillance for  
581 SARS-CoV-2 variants in Mexico" to CFA) from the AHF Global Public Health Institute at  
582 the University of Miami.

583 **Acknowledgments**

584 We thank Eduardo Márquez García from Unidad de Biología Molecular, INER for  
585 technical assistance in Illumina sequencing. We also thank all physicians of the ICU for  
586 assistance with patient management.

587 **Authors contributions**

588 Conceptualization: PGD, VAT, SAR, RPP, CFA, and JAVP. Methodology: CB, KTD,  
589 MMF, MPG, MEJC, FMN, and JAVP. Formal Analysis: AHT, MVR, RSM, and JAVP.  
590 Visualization: AHT. Investigation: PGD, MVR, CB, BT, EP, VAT, KTD, MMF, RSM,  
591 FJH, EBV, OB, JAMO, and JAVP. Resources: PGD, VAT, SAR, RPP, CFA, and JAVP.  
592 Data Curation: AHT. Writing-Original Draft Preparation: AHT, PGD, MVR, CB, VAT,  
593 RSM, RPP, CFA, and JAVP. Writing-Review & Editing: All authors. Supervision: CFA,  
594 and JAVP. Funding Acquisition: CFA, and JAVP.

595 **Institutional Review Board Statement**

596 This study was reviewed and approved by the Science, Biosecurity, and Bioethics  
597 Committee of the Instituto Nacional de Enfermedades Respiratorias (protocol number B-  
598 10-20).

599 **Informed Consent Statement**

600 Informed consent was provided according to the Declaration of Helsinki. Written informed  
601 consent has been obtained from the patients and/or from their relatives or authorized legal  
602 guardians to publish this paper.

603 **Data Availability Statement**

604 The genomic information generated during the current study is available in the GenBank  
605 repository, accession numbers: ON158371-ON158443. The clinical datasets used during  
606 the current study are available from the corresponding author on reasonable request.

607 **Conflict of Interest**

608 The authors declare that they have no competing interests. The sponsors had no role in the  
609 design, execution, interpretation, or writing on the study.

610

611

612

613

614

615

616

617

618

619

620

621

622 REFERENCES

- 623 1. Zhu, N.; Zhang, D.; Wang, W.; Li, X.; Yang, B.; Song, J.; Zhao, X.; Huang, B.; Shi, W.; Lu, R.; et al.  
624 A Novel Coronavirus from Patients with Pneumonia in China, 2019. *N. Engl. J. Med.* **2020**, *382*, 727–  
625 733, doi:10.1056/nejmoa2001017.
- 626 2. Organization, W.H. WHO Coronavirus Disease (COVID-19) Dashboard.
- 627 3. Isabel, S.; Graña-Miraglia, L.; Gutierrez, J.M.; Bundalovic-Torma, C.; Groves, H.E.; Isabel, M.R.;  
628 Eshaghi, A.R.; Patel, S.N.; Gubbay, J.B.; Poutanen, T.; et al. Evolutionary and Structural Analyses of  
629 SARS-CoV-2 D614G Spike Protein Mutation Now Documented Worldwide. *Sci. Rep.* **2020**, *10*, 1–9,  
630 doi:10.1038/s41598-020-70827-z.
- 631 4. Giovanetti, M.; Benedetti, F.; Campisi, G.; Ciccozzi, A.; Fabris, S.; Ceccarelli, G.; Tambone, V.;  
632 Caruso, A.; Angeletti, S.; Zella, D.; et al. Evolution Patterns of SARS-CoV-2: Snapshot on Its  
633 Genome Variants. *Biochem. Biophys. Res. Commun.* **2021**, *538*, 88–91,  
634 doi:10.1016/j.bbrc.2020.10.102.
- 635 5. Harvey, W.T.; Carabelli, A.M.; Jackson, B.; Gupta, R.K.; Thomson, E.C.; Harrison, E.M.; Ludden,  
636 C.; Reeve, R.; Rambaut, A.; Peacock, S.J.; et al. SARS-CoV-2 Variants, Spike Mutations and  
637 Immune Escape. *Nat. Rev. Microbiol.* **2021**, *19*, 409–424, doi:10.1038/s41579-021-00573-0.
- 638 6. Ong, S.W.; Chiew, C.J.; Ang, L.W.; Mak, T.-M.; Cui, L.; HS Toh, M.P.; Lim, Y.D.; Lee, P.H.; Lee,  
639 T.H.; Chia, P.Y.; et al. Clinical and Virological Features of SARS-CoV-2 Variants of Concern: A  
640 Retrospective Cohort Study Comparing B.1.1.7 (Alpha), B.1.315 (Beta), and B.1.617.2 (Delta). *Clin.*  
641 *Infect. Dis.* **2021**, *August*, 23:ciab721.
- 642 7. Taboada, B.; Zárate, S.; Iña, P.; Boukadida, C.; Vazquez-perez, J.A.; Muñoz-medina, J.E.;  
643 Ramírez-gonzález, J.E.; Comas-garcía, A.; Grajales-muñiz, C.; Rincón-rubio, A.; et al. Genetic  
644 Analysis of sars-cov-2 Variants in Mexico during the First Year of the covid-19 Pandemic. *Viruses*  
645 **2021**, *13*, 1–20, doi:10.3390/v13112161.
- 646 8. Cedro-tanda, A.; Laura, G.; Anda-jauregui, G. De; Garnica-l, D.; Alfaro-mora, Y.; Sonia, S.; Garc,  
647 E.F.; Mendoza-vargas, A.; Fr, E.J.; Moreno, B.; et al. Early Genomic, Epidemiological, and Clinical  
648 Description of the SARS-CoV-2 Omicron Variant in Mexico City. *Viruses* **2022**, *14*, v14030545.
- 649 9. Rodríguez-Maldonado, A.P.; Vázquez-Pérez, J.A.; Cedro-Tanda, A.; Taboada, B.; Boukadida, C.;

- 650 Wong-Arámula, C.; Nuñez-García, T.E.; Cruz-Ortiz, N.; Barrera-Badillo, G.; Hernández-Rivas, L.;  
651 et al. Emergence and Spread of the Potential Variant of Interest (VOI) B.1.1.519 of SARS-CoV-2  
652 Predominantly Present in Mexico. *Arch. Virol.* **2021**, *166*, 3173–3177, doi:10.1007/s00705-021-  
653 05208-6.
- 654 10. Cedro-tanda, A.; Laura, G.; Anda-jauregui, G. De; Peñaloza, F.; Moreno, B.; Escobar-arrazola, M.A.;  
655 Ramirez-vega, O.A.; Munguia-garza, P.; Garcia-cardenas, F.; Cisneros-villanueva, M.; et al. The  
656 Evolutionary Landscape of SARS-CoV-2 Variant B.1.1.519 and Its Clinical Impact in Mexico City.  
657 *Viruses* **2021**, *13*, v13112182.
- 658 11. Salud, S. de *COVID-19 MÉXICO: Comunicado Técnico Diario*; Mexico City, 2021;
- 659 12. Butt, A.A.; Nafady-hego, H.; Chemaitelly, H.; Abou-Samra, A.-B.; Al Khal, A.; Coyle, P. V.; Al  
660 Kanaani, Z.; Kaleeckal, A.H.; Latif, A.N.; Masalmani, Y. Al; et al. Outcomes Among Patients with  
661 Breakthrough SARS-CoV-2 Infection After Vaccination. *Int. J. Infect. Dis.* **2020**, *110*, 353–358.
- 662 13. Huang, Y.Z.; Kuan, C.C. Vaccination to Reduce Severe COVID-19 and Mortality in COVID-19  
663 Patients: A Systematic Review and Meta-Analysis. *Eur. Rev. Med. Pharmacol. Sci.* **2022**, *26*, 1770–  
664 1776, doi:10.26355/eurrev\_202203\_28248.
- 665 14. Prévost, J.; Finzi, A. The Great Escape? SARS-CoV-2 Variants Evading Neutralizing Responses. *Cell*  
666 *Host Microbe* **2021**, *29*, 322–324, doi:10.1016/j.chom.2021.02.010.
- 667 15. Thakur, S.; Sasi, S.; Pillai, S.G.; Nag, A.; Shukla, D.; Singhal, R.; Phalke, S.; Velu, G.S.K. SARS-  
668 CoV-2 Mutations and Their Impact on Diagnostics, Therapeutics and Vaccines. *Front. Med.* **2022**, *9*,  
669 doi:10.3389/fmed.2022.815389.
- 670 16. Bakhshandeh, B.; Jahanafrooz, Z.; Abbasi, A.; Babaee, M.; Sadeghi, M.; Sadeq, M.M.; Zamani, M.  
671 Mutations in SARS-CoV-2; Consequences in Structure, Function, and Pathogenicity of the Virus.  
672 *Microb. Pathog.* **2020**, *154*, 104831, doi:10.1016/j.micpath.2021.104831.
- 673 17. Bian, L.; Gao, F.; Zhang, J.; He, Q.; Mao, Q.; Xu, M.; Liang, Z. Effects of SARS-CoV-2 Variants on  
674 Vaccine Efficacy and Response Strategies. *Expert Rev. Vaccines* **2021**, *20*, 365–373,  
675 doi:10.1080/14760584.2021.1903879.
- 676 18. Castillo, A.E.; Parra, B.; Tapia, P.; Acevedo, A.; Lagos, J.; Andrade, W.; Arata, L.; Leal, G.; Barra,  
677 G.; Tambley, C.; et al. Phylogenetic Analysis of the First Four SARS-CoV-2 Cases in Chile. *J. Med.*

- 678 *Virol.* **2020**, 92, 1562–1566, doi:10.1002/jmv.25797.
- 679 19. Kumar, S.; Stecher, G.; Li, M.; Knyaz, C.; Tamura, K. MEGA X: Molecular Evolutionary Genetics  
680 Analysis across Computing Platforms. *Mol. Biol. Evol.* **2018**, 35, 1547–1549,  
681 doi:10.1093/molbev/msy096.
- 682 20. Katoh, K.; Misawa, K.; Kuma, K.I.; Miyata, T. MAFFT: A Novel Method for Rapid Multiple  
683 Sequence Alignment Based on Fast Fourier Transform. *Nucleic Acids Res.* **2002**, 30, 3059–3066,  
684 doi:10.1093/nar/gkf436.
- 685 21. Rambaut, A. FigTree 2012, 1–8.
- 686 22. Wang, J.; Tong, Y.; Li, D.; Li, J.; Li, Y. The Impact of Age Difference on the Efficacy and Safety of  
687 COVID-19 Vaccines: A Systematic Review and Meta-Analysis. *Front. Immunol.* **2021**, 12, 1–8,  
688 doi:10.3389/fimmu.2021.758294.
- 689 23. National Institutes of Health *Treatment Guidelines. Coronavirus Disease 2019 (COVID-19)*; 2021;
- 690 24. Team, R.C. R: A Language and Environment for Statistical Computing. 2020.
- 691 25. Wickham, H.; Chang, W.; Pedersen Lin, T.; Takahashi, K.; Wilke, C.; Woo, K. *ggplot2: Elegant*  
692 *Graphics for Data Analysis*; Springer-Verlag: New York, 2016; ISBN 978-3-319-24277-4.
- 693 26. Therneau, P.M. A Package for Survival Analysis in R 2020.
- 694 27. Kassambara, A.; Kosinski, M.; Biecek, P. *Survminer: Drawing Survival Curves Using ggplot2* 2021.
- 695 28. Williamson, E.J.; Walker, A.J.; Bhaskaran, K.; Bacon, S.; Morton, C.E.; Curtis, H.J.; Mehrkar, A.;  
696 Evans, D.; Cockburn, J.; McDonald, H.I.; et al. OpenSAFELY: Factors Associated with COVID-19  
697 Death in 17 Million Patients. *Nature* **2020**, 584, 430–436, doi:10.1038/s41586-020-2521-  
698 4.OpenSAFELY.
- 699 29. Martos-Benítez, F.D.; Soler-Morejón, C.D.; García-del Barco, D. Chronic Comorbidities and Clinical  
700 Outcomes in Patients with and without COVID-19: A Large Population-Based Study Using National  
701 Administrative Healthcare Open Data of Mexico. *Intern. Emerg. Med.* **2021**, 16, 1507–1517,  
702 doi:10.1007/s11739-020-02597-5.
- 703 30. Collier, D.A.; Ferreira, I.A.T.M.; Kotagiri, P.; Datir, R.P.; Lim, E.Y.; Touizer, E.; Meng, B.;  
704 Abdullahi, A.; Baker, S.; Dougan, G.; et al. Age-Related Immune Response Heterogeneity to SARS-  
705 CoV-2 Vaccine BNT162b2. *Nature* **2021**, 596, 417–422, doi:10.1038/s41586-021-03739-1.



- 706 31. Gutiérrez-González, E.; Cantero-Escribano, J.M.; Redondo-Bravo, L.; San Juan-Sanz, I.; Robustillo-  
707 Rodela, A.; Cendejas-Bueno, E.; Influenza Working Group Effect of Vaccination, Comorbidities and  
708 Age on Mortality and Severe Disease Associated with Influenza during the Season 2016–2017 in a  
709 Spanish Tertiary Hospital. *J. Infect. Public Health* **2019**, *12*, 486–491,  
710 doi:10.1016/j.jiph.2018.11.011.
- 711 32. Asano, T.; Immunol, S.; Asano, T.; Boisson, B.; Onodi, F.; Matuozzo, D.; Moncada-velez, M.; Raj,  
712 M.; Maglorius, L.; Zhang, P.; et al. X-Linked Recessive TLR7 Deficiency in ~ 1 % of Men under 60  
713 Years Old with Life-Threatening COVID-19. *Sci. Immunol.* **2021**, *4348*, 1–31.
- 714 33. Zeberg, H. The Major Genetic Risk Factor for Severe COVID-19 Is Associated with Protection  
715 against HIV. *Proc. Natl. Acad. Sci. U. S. A.* **2022**, *119*, 17–19, doi:10.1073/pnas.2116435119.
- 716 34. Kahn, F.; Bonander, C.; Moghaddassi, M.; Rasmussen, M.; Malmqvist, U.; Inghammar, M.; Björk, J.  
717 Risk of Severe COVID-19 from the Delta and Omicron Variants in Relation to Vaccination Status,  
718 Sex, Age and Comorbidities - Surveillance Results from Southern Sweden. *medRxiv* **2022**, *27*,  
719 doi:10.2807/1560-7917.ES.2022.27.9.2200121.
- 720 35. Markanday, A. Acute Phase Reactants in Infections: Evidence-Based Review and a Guide for  
721 Clinician. *Open Forum Infect. Dis.* **2015**, *2*, doi:10.1093/o.
- 722 36. Ng, J.H.; Bijol, V.; Sparks, M.A.; Sise, M.E.; Izzedine, H.; Jhaveri, K.D. Pathophysiology and  
723 Pathology of Acute Kidney Injury in Patients With COVID-19. *Adv. Chronic Kidney Dis.* **2020**, *27*,  
724 365–376, doi:10.1053/j.ackd.2020.09.003.
- 725 37. Wu, M.A.; Fossali, T.; Pandolfi, L.; Carsana, L.; Ottolina, D.; Frangipane, V.; Rech, R.; Tosoni, A.;  
726 Lopez, G.; Agarossi, A.; et al. Hypoalbuminemia in COVID-19: Assessing the Hypothesis for  
727 Underlying Pulmonary Capillary Leakage. *J. Intern. Med.* **2021**, *289*, 861–872,  
728 doi:10.1111/joim.13208.
- 729 38. Zhou, F.; Yu, T.; Du, R.; Fan, G.; Liu, Y.; Liu, Z.; Xiang, J.; Wang, Y.; Song, B.; Gu, X.; et al.  
730 Clinical Course and Risk Factors for Mortality of Adult Inpatients with COVID-19 in Wuhan, China:  
731 A Retrospective Cohort Study. *Lancet* **2020**, *395*, 1054–1062, doi:10.1016/S0140-6736(20)30566-3.
- 732 39. Choi, W.S.; Cheong, H.J. COVID-19 Vaccination for People with Comorbidities. *Infect. Chemother.*  
733 **2021**, *53*, 155–158, doi:10.3947/IC.2021.0302.

- 734 40. Ahmad, L. Implication of SARS-CoV-2 Immune Escape Spike Variants on Secondary and Vaccine  
735 Breakthrough Infections. *Front. Immunol.* **2021**, *12*, 1–7, doi:10.3389/fimmu.2021.742167.
- 736 41. Lou, F.; Li, M.; Pang, Z.; Jiang, L.; Guan, L.; Tian, L.; Hu, J.; Fan, J.; Fan, H. Understanding the  
737 Secret of SARS-CoV-2 Variants of Concern/Interest and Immune Escape. *Front. Immunol.* **2021**, *12*,  
738 1–19, doi:10.3389/fimmu.2021.744242.
- 739 42. Moghaddar, M.; Radman, R.; Macreadie, I. Severity, Pathogenicity and Transmissibility of Delta and  
740 Lambda Variants of SARS-CoV-2, Toxicity of Spike Protein and Possibilities for Future Prevention  
741 of COVID-19. *Microorganisms* **2021**, *9*, doi:10.3390/microorganisms9102167.
- 742 43. Hu, Z.; Huang, X.; Zhang, J.; Fu, S.; Ding, D.; Tao, Z. Differences in Clinical Characteristics  
743 Between Delta Variant and Wild-Type SARS-CoV-2 Infected Patients. *Front. Med.* **2022**, *8*, 1–9,  
744 doi:10.3389/fmed.2021.792135.
- 745 44. Paredes, M.I.; Lunn, S.M.; Famulare, M.; Frisbie, L.A.; Painter, I.; Burstein, R.; Roychoudhury, P.;  
746 Xie, H.; Bakash, S.A.M.; Perez, R.; et al. Associations between SARS-CoV-2 Variants and Risk of  
747 COVID-19 Hospitalization among Confirmed Cases in Washington State: A Retrospective Cohort  
748 Study. *Clin. Infect. Dis.* **2000**, *12*, 1–18.
- 749 45. Lauring, A.S.; Tenforde, M.W.; Chappell, J.D.; Gaglani, M.; Ginde, A.A.; Mcneal, T.; Ghamande, S.;  
750 Douin, D.J.; Talbot, H.K.; Casey, J.D.; et al. Clinical Severity Of, and Effectiveness of mRNA  
751 Vaccines Against, Covid-19 from Omicron, Delta, and Alpha SARS-CoV-2 Variants in the United  
752 States: Prospective Observational Study. *BMJ* **2022**, *376*, doi:10.1136/bmj-2021-069761.
- 753 46. Everett, J.; Hokama, P.; Roche, A.M.; Reddy, S.; Hwang, Y.; Kessler, L.; Glascock, A.; Li, Y.;  
754 Whelan, J.N.; Weiss, S.R.; et al. SARS-CoV-2 Genomic Variation in Space and Time in Hospitalized  
755 Patients in Philadelphia. *MBio* **2021**, *12*, 1–16, doi:10.1128/mBio.03456-20.
- 756 47. Boukadida, C.; Taboada, B.; Escalera-Zamudio, M.; Isa, P.; Ramírez-González, J.E.; Vazquez-Perez,  
757 J.A.; Muñoz-Medina, J.E.; Grajales-Muñiz, C.; González-Torres, C.; Gaytán-Cervantes, F.J.; et al.  
758 Genomic Characterization of SARS-CoV-2 Isolated from Patients with Distinct Disease Outcomes in  
759 Mexico. *Microbiol. Spectr.* **2022**, *10*, doi:10.1128/spectrum.01249-21.
- 760 48. Lippi, G.; Plebani, M.; Henry, B.M. Thrombocytopenia Is Associated with Severe Coronavirus  
761 Disease 2019 (COVID-19) Infections: A Meta-Analysis. *Clin. Chim. Acta* **2020**, *506*, 145–148,

762 doi:10.1016/j.cca.2020.03.022.

763 49. Henry, B.M.; Aggarwal, G.; Wong, J.; Benoit, S.; Vikse, J.; Plebani, M.; Lippi, G. Lactate  
764 Dehydrogenase Levels Predict Coronavirus Disease 2019 (COVID-19) Severity and Mortality: A  
765 Pooled Analysis. *Am. J. Emerg. Med.* **2020**, *38*, 1722–1726.

766 50. Stupica, D.; Collinet-Adler, S.; Kejžar, N.; Jagodic, Z.; Poljak, M.; Klevišar, M.N. The Impact of  
767 SARS-CoV-2 Primary Vaccination in a Cohort of Patients Hospitalized for Acute COVID-19 during  
768 Delta Variant Predominance. *J. Clin. Med.* **2022**, *11*, doi:10.3390/jcm11051191.

769

770

771

772

773

774

775

776

777

778
